# Supplementary material
Source: PubMed Central journal article supplement (PMC3009828)
Supplement: 1014923108_pnas.201014923SI.pdf [file 1014923108_pnas.201014923SI.pdf]

# Supporting Information

Gianni et al. 10.1073/pnas.1014923108

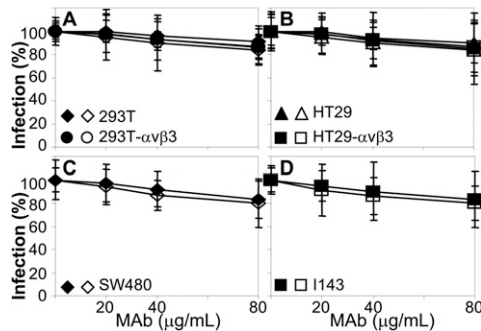

**Fig. S1.** Effect of mAb AP3 to  $\alpha V\beta 3$ -integrin on R8102 infection. mAb AP3 does not block interaction of  $\alpha V\beta 3$ -integrin with its ligands. The indicated cells lines were exposed to indicated concentrations of mAb AP3 (full symbols) or control IgGs (void symbols) for 1 h, infected with R8102 (3 pfu/cell) in the same medium, and overlaid with mAb-containing medium until harvesting. In A–D, the extent of infection was quantified from the Lac-Z gene engineered in the viral genome under the immediate-early  $\alpha 27$  promoter. Cells in 96 wells were fixed at 6–8 h after infection. Extent of  $\beta$ -Galactosidase activity reflects the amount of infection. Each point represents triplicates' average; 100% infection is the value obtained with no antibody. Bars show SD.

**Table S1.** Percentage cell viability in cultures exposed to inhibitors determined by Alamar Blue

| Inhibitor              | CHO-N1 $\alpha$ $\pm$ $\alpha V\beta 3$ | CHO-N1 $\delta$ $\pm$ $\alpha V\beta 3$ | J-N1 $\delta$ $\pm$ $\alpha V\beta 3$ | 293T | HT29 $\pm$ $\alpha V\beta 3$ | SW480 | I143 |
|------------------------|-----------------------------------------|-----------------------------------------|---------------------------------------|------|------------------------------|-------|------|
| Nystatin (100 $\mu$ M) | 94                                      | 96                                      | 98                                    | 99   | 95                           | 97    | 95   |
| Filipin (3 $\mu$ M)    | 90                                      | 95                                      | 98                                    | 100  | 93                           | 98    | 94   |
| Dynasore (75 $\mu$ M)  | 91                                      | 93                                      | 97                                    | 98   | 95                           | 94    | 95   |
| BFLA (30 nM)           | 98                                      | 97                                      | 97                                    | 100  | 97                           | 94    | 96   |

For all inhibitors, for each concentration and cell line, toxicity was measured simultaneously with the effect of the inhibitors on virus infection by adding 10% Alamar Blue (Invitrogen) to replicate specimens in DMEM lacking phenol red from 0 time until harvesting and optical reading at 570 and 600 nm. Figures in the table represent the percent of viable cells at the highest inhibitor concentration (reported in parentheses). BFLA, bafilomycin A.

**Table S2.**  $\alpha V\beta 3$ -integrin modifies HSV entry pathway (summary of main modifications induced by  $\alpha V\beta 3$ -integrin)

| Inhibition of infection | CHON1 $\delta$ - |                   | CHO-N1 $\alpha$ - |                   | J-N1 $\alpha$ - |                   | 293   | 293- $\alpha V\beta 3$ | HT    | HT- $\alpha V\beta 3$ | SW 480 | I143  |
|-------------------------|------------------|-------------------|-------------------|-------------------|-----------------|-------------------|-------|------------------------|-------|-----------------------|--------|-------|
|                         | CHO-N1 $\delta$  | $\alpha V\beta 3$ | CHO-N1 $\alpha$   | $\alpha V\beta 3$ | J-N1 $\alpha$   | $\alpha V\beta 3$ |       |                        |       |                       |        |       |
| mAb L230                |                  | +                 |                   | +                 |                 |                   | $\pm$ | +                      | $\pm$ | +                     | ++     | -     |
| Nystatin                | -                | +                 | -                 | +                 | -               | +                 | +     | ++                     | -     | ++                    | +      | -     |
| Filipin                 | -                | +                 | -                 | +                 | $\pm$           | +                 | +     | ++                     | +     | ++                    | +      | -     |
| Cav1Y14A                | -                | -                 |                   |                   |                 |                   |       |                        |       |                       |        |       |
| Dynasore                | -                | +                 | -                 | +                 | -               | +                 | +     | ++                     | +     | ++                    | ++     | $\pm$ |
| DYN K44A                | -                | +                 | -                 | +                 |                 |                   |       |                        |       |                       |        |       |
| BFLA                    | +                | +                 | +                 | +                 | -               | +                 | +     | ++                     | +     | +                     | +      | -     |

Inhibition 0–20% (-); inhibition 20–40% ( $\pm$ ); inhibition >40% (+); inhibition >80% (++)
